# Supplementary material for: Detection and Complete Genomic Analysis of Porcine circovirus 3 (PCV3) in Diarrheic Pigs from the Dominican Republic: First Report on PCV3 from the Caribbean Region
Source: MDPI journal article supplement (doi:10.3390/pathogens12020250), 2023-02-04
Supplement: s1 [file s1]

**Supplementary Table S1.** Primers used in three overlapping nested PCR assays to amplify the complete genomes of *Porcine circovirus 3* (PCV3) strains from the Dominican Republic.

| Nested PCR reaction |            | Primer name            | Primer sequence † (5'-3')                        | Primer position ‡                |
|---------------------|------------|------------------------|--------------------------------------------------|----------------------------------|
| <b>A</b>            | First PCR  | PCV3-F-A<br>PCV3-R-A   | TGAGTGGATATACCGGGCAGTG<br>TCCGATGAATACCACTCCTCCG | nt 88-nt 109<br>nt 1011-nt 990   |
|                     | Second PCR | PCV3-FN-A<br>PCV3-RN-A | GTGTTTTGATGCCGCAGGAC<br>CCACAAAATTAACAAACCCACCC  | nt 127-nt 146<br>nt 946-nt 924   |
|                     |            |                        |                                                  |                                  |
| <b>B</b>            | First PCR  | PCV3-F-B<br>PCV3-R-B   | GGGTTTGCGTGATTTTTGCGG<br>AAACACAGCCGTTACTTCACCC  | nt 645-nt 665<br>nt 1570-nt 1549 |
|                     | Second PCR | PCV3-FN-B<br>PCV3-RN-B | GATGGGGTTGGGTAAACCGC<br>TTCTGGCGGGAACCTACCAGC    | nt 669-nt 688<br>nt 1539-nt 1520 |
|                     |            |                        |                                                  |                                  |
| <b>C</b>            | First PCR  | PCV3-F-C<br>PCV3-R-C   | ATGCGAGGGCGTTTACCTGTG<br>CTTCACCGAGCTGAGTCGCC    | nt 1238-nt 1258<br>nt 420-nt 401 |
|                     | Second PCR | PCV3-FN-C<br>PCV3-RN-C | CCACCGGAGGGGTCAGATT<br>GTACCCTTGCAAGTGTGGGG      | nt 1309-nt 1328<br>nt 381-nt 362 |

† The primer sequences were determined from conserved regions among PCV3 genomes.

‡ Nucleotide (nt) positions are those of reference PCV3 strain PCV3/CN/Fujian-5/2016 (GenBank accession number KY075986).
